# Supplementary material
Source: MDPI journal article supplement (https://www.mdpi.com/1424-8247/15/1/64)
Supplement: s1 [file s1]

# Synthesis of novel (*S*)-3-(1-aminoethyl)-8-pyrimidinyl-2-phenylisoquinolin-1(2*H*)-ones by Suzuki-Miyaura coupling and their cell toxicity activities

Ok Kyoung Choi<sup>1,2</sup>, Yong Ho Sun<sup>2</sup>, Hyemi Lee<sup>2</sup>, Joon Kwang Lee<sup>2</sup>, Taehoon Lee<sup>1,\*</sup>, Hakwon Kim<sup>1,\*</sup>

<sup>1</sup> Department of Applied Chemistry and Global Center for Pharmaceutical Ingredient Materials, Kyung Hee University, Yongin 17410, Republic of Korea

<sup>2</sup> Process Research, Boryung R&D Institute, Ansan 15425, Republic of Korea

\* Correspondence: hwkim@khu.ac.kr (H.K.); thlee@khu.ac.kr (T. L.); Tel.: +82-31-201-2459 (H.K.); +82-31-201-5173 (T. L.)

## Table of Contents:

|                                                      |              |
|------------------------------------------------------|--------------|
| <sup>1</sup> H and <sup>13</sup> C NMR Spectra ..... | page 2 - 12  |
| Cell toxicity .....                                  | page 13 - 17 |

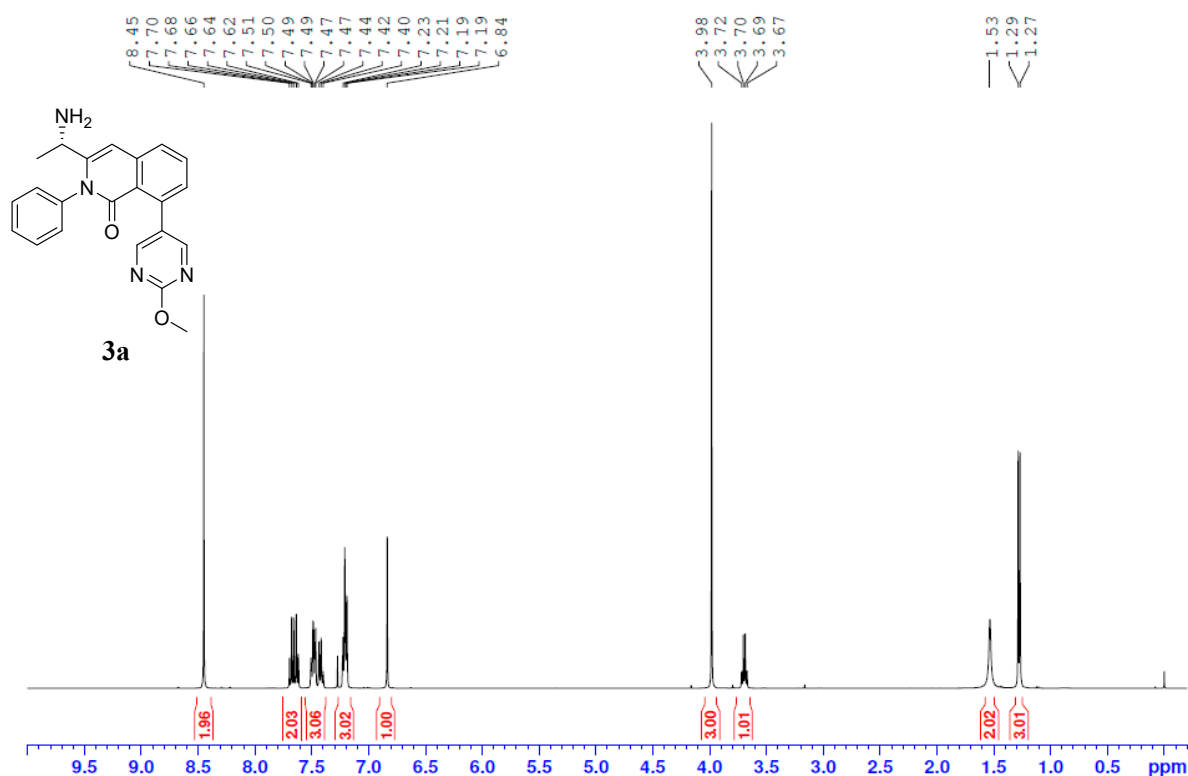

**Figure S1.** <sup>1</sup>H NMR Spectrum of 3-[(1S)-1-aminoethyl]-8-(2-methoxypyrimidin-5-yl)-2-phenylisoquinolin-1-one (**3a**)

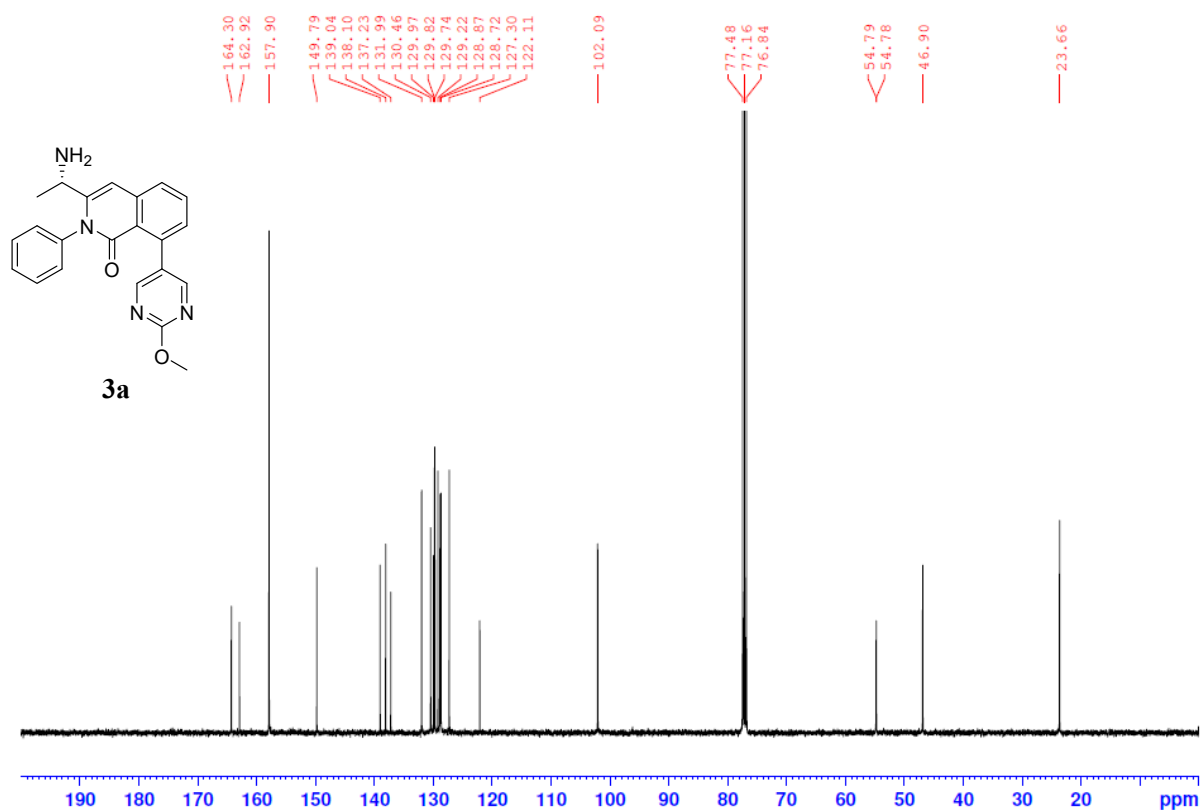

**Figure S2.** <sup>13</sup>C NMR Spectrum of 3-[(1S)-1-aminoethyl]-8-(2-methoxypyrimidin-5-yl)-2-phenylisoquinolin-1-one (**3a**)

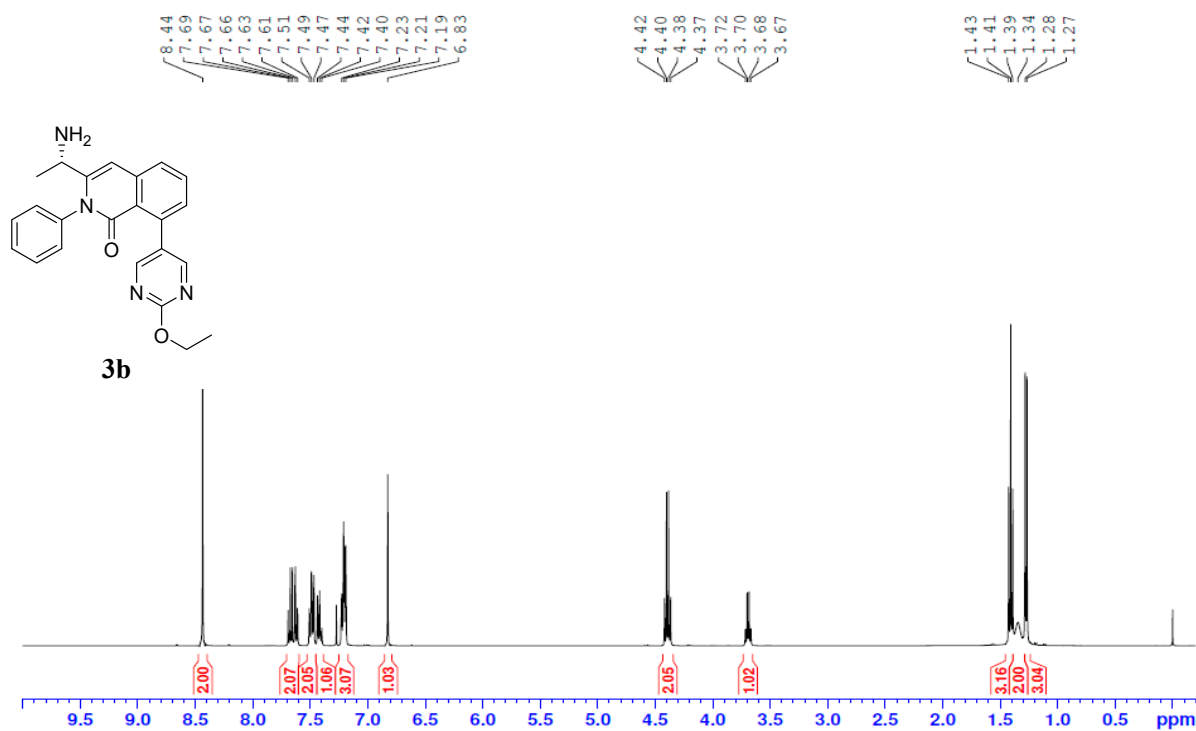

**Figure S3.** <sup>1</sup>H NMR Spectrum of 3-[(1S)-1-aminoethyl]-8-(2-ethoxypyrimidin-5-yl)-2-phenylisoquinolin-1-one (**3b**)

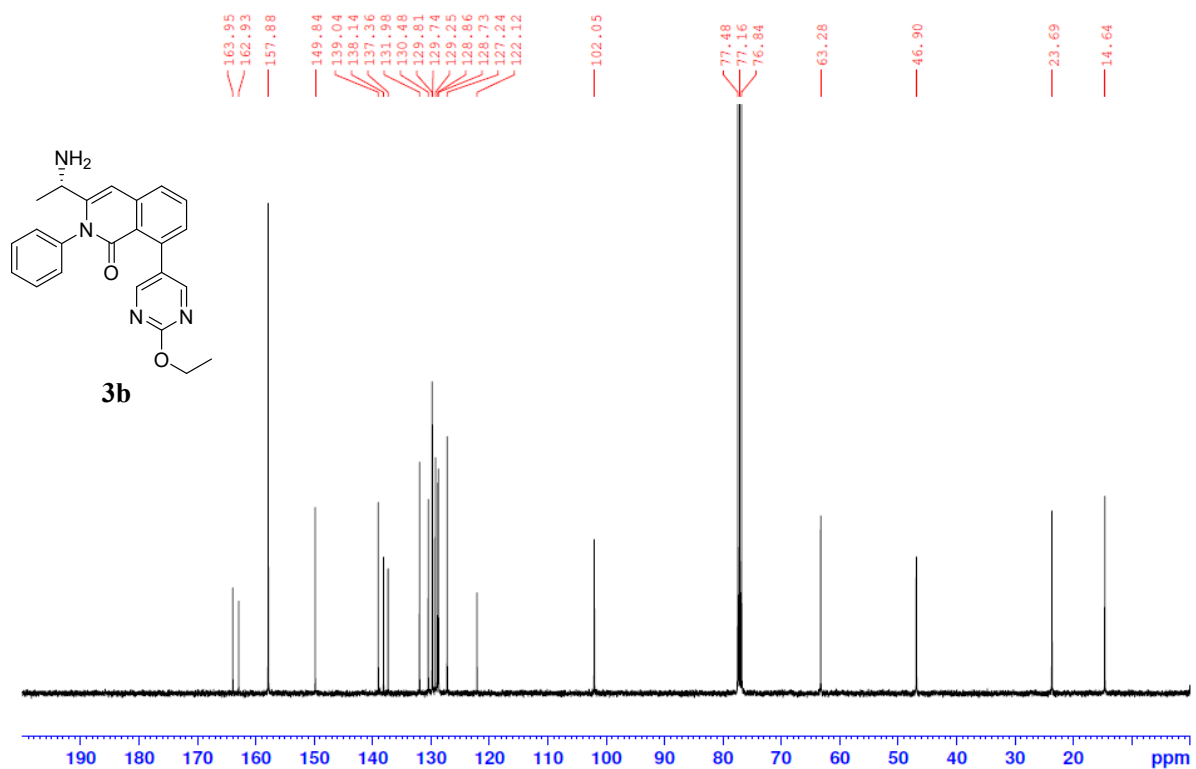

**Figure S4.** <sup>13</sup>C NMR Spectrum of 3-[(1S)-1-aminoethyl]-8-(2-ethoxypyrimidin-5-yl)-2-phenylisoquinolin-1-one (**3b**)

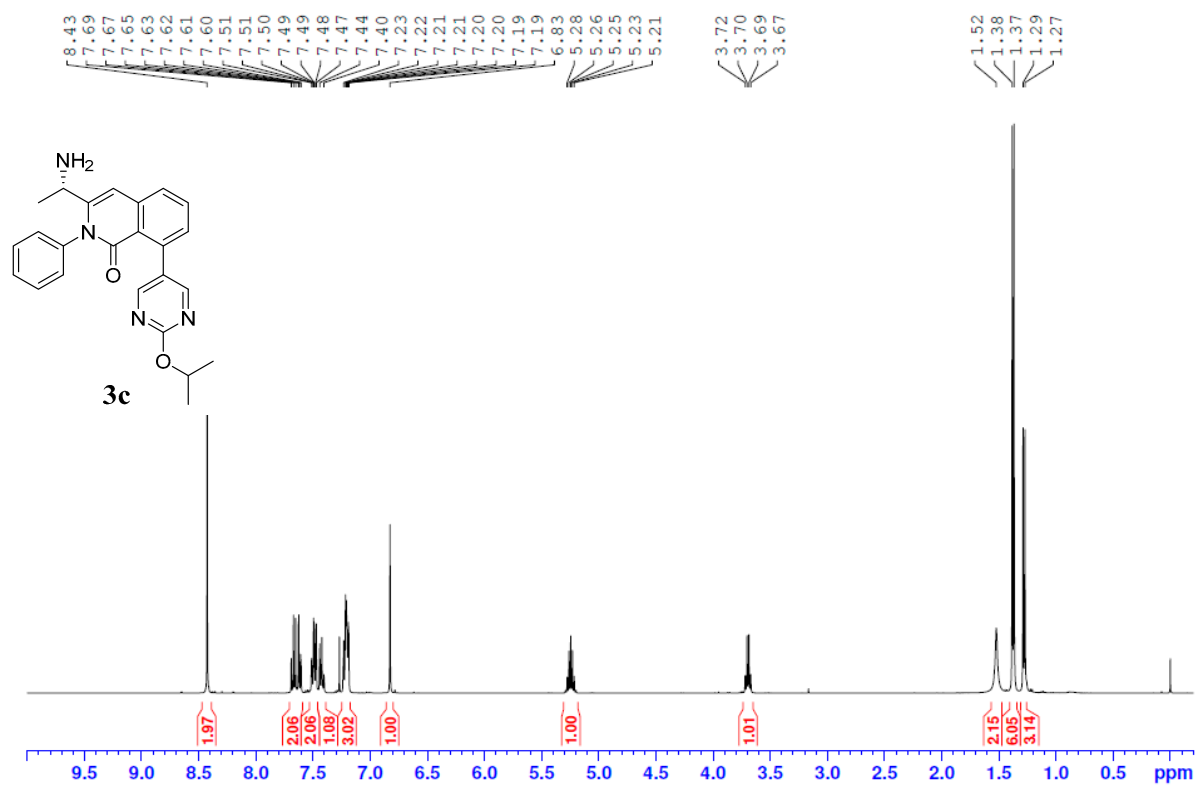

**Figure S5.** <sup>1</sup>H NMR Spectrum of 3-[(1S)-1-aminoethyl]-8-(2-isopropoxypyrimidin-5-yl)-2-phenyl-isoquinolin-1-one (**3c**)

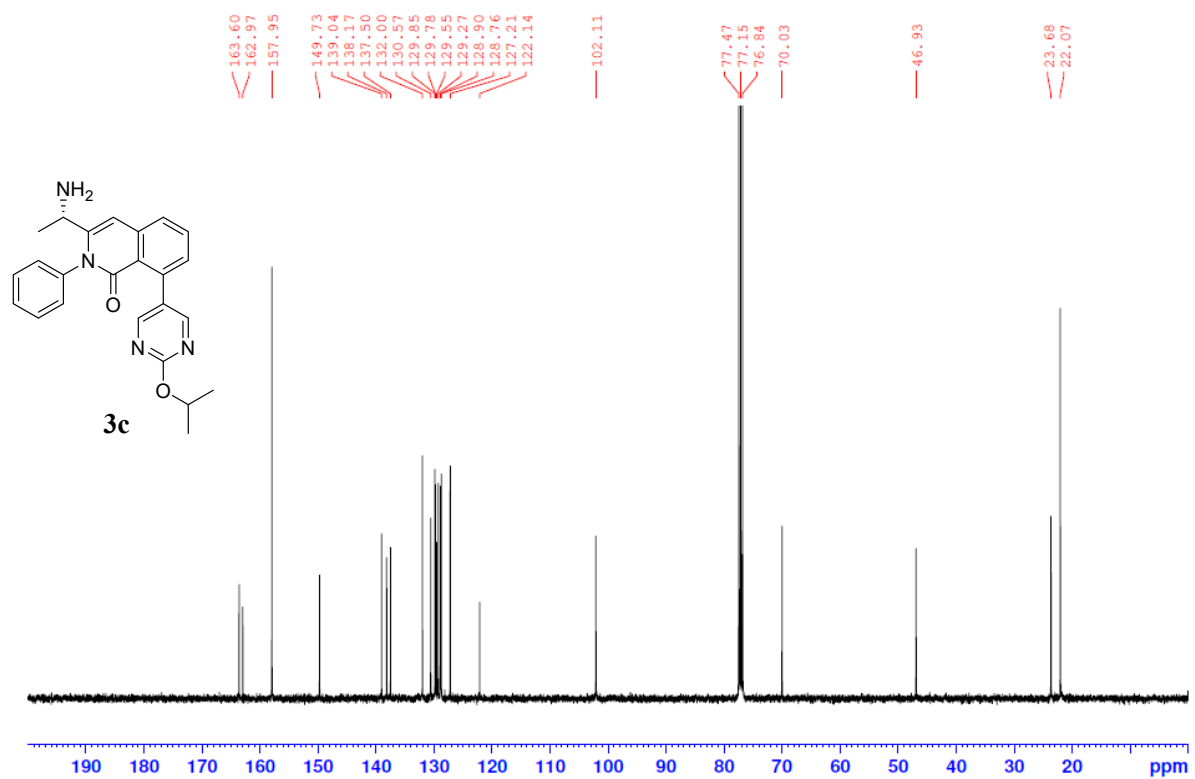

**Figure S6.** <sup>13</sup>C NMR Spectrum of 3-[(1S)-1-aminoethyl]-8-(2-isopropoxypyrimidin-5-yl)-2-phenyl-isoquinolin-1-one (**3c**)

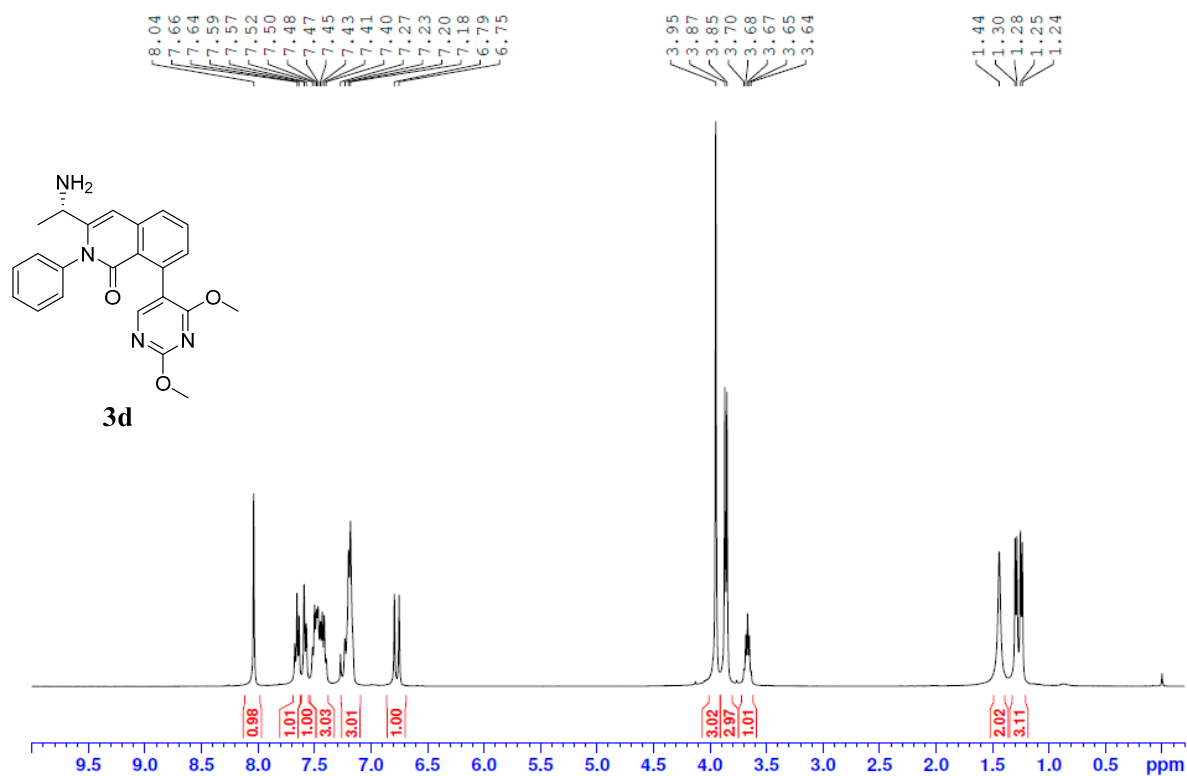

**Figure S7.** <sup>1</sup>H NMR Spectrum of 3-[(1S)-1-aminoethyl]-8-(2,4-dimethoxypyrimidin-5-yl)-2-phenyl-isoquinolin-1-one (**3d**)

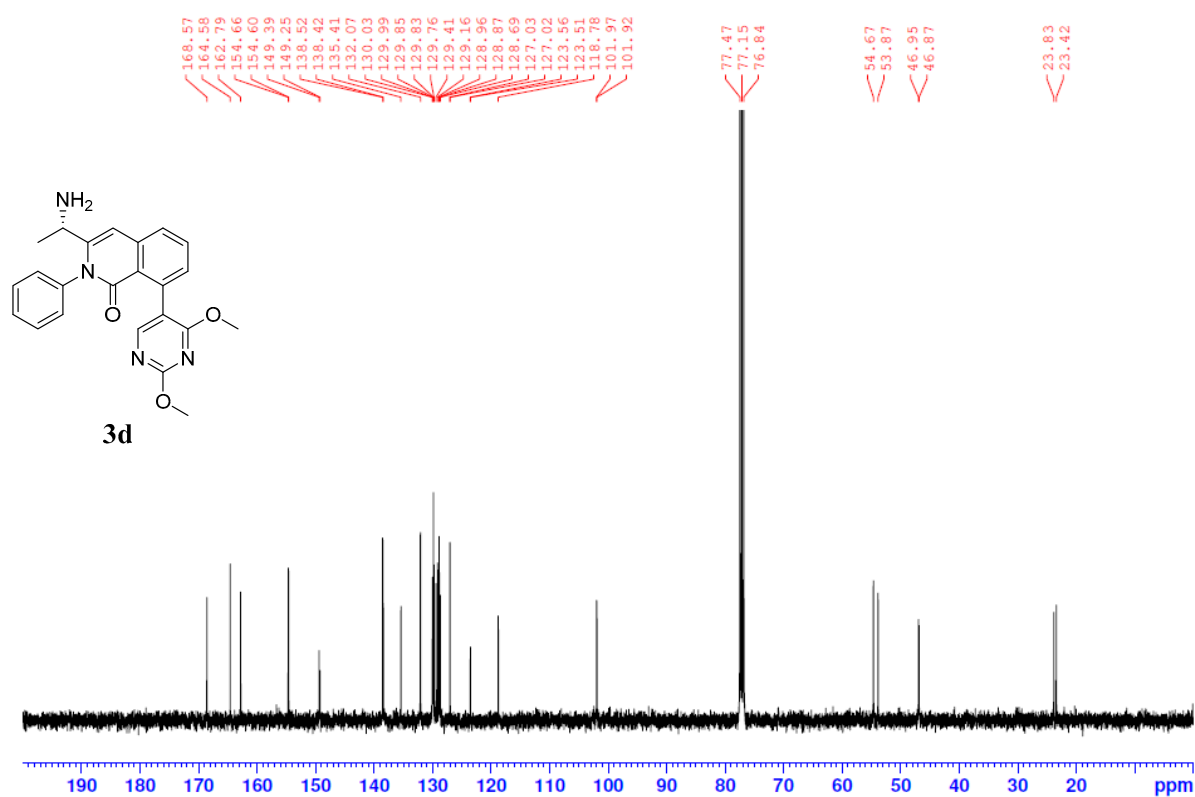

**Figure S8.** <sup>13</sup>C NMR Spectrum of 3-[(1S)-1-aminoethyl]-8-(2,4-dimethoxypyrimidin-5-yl)-2-phenyl-isoquinolin-1-one (**3d**)

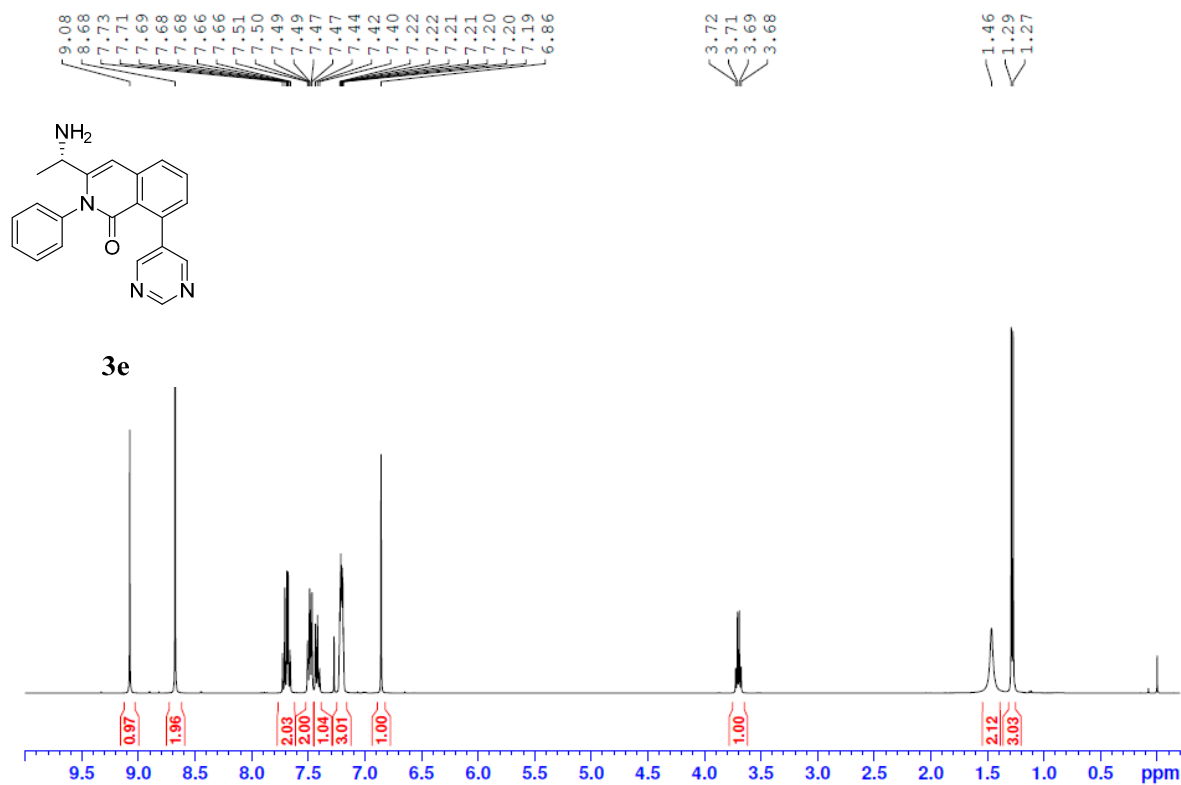

**Figure S9.** <sup>1</sup>H NMR Spectrum of 3-[(1S)-1-aminoethyl]-2-phenyl-8-pyrimidin-5-yl-isoquinolin-1-one (**3e**)

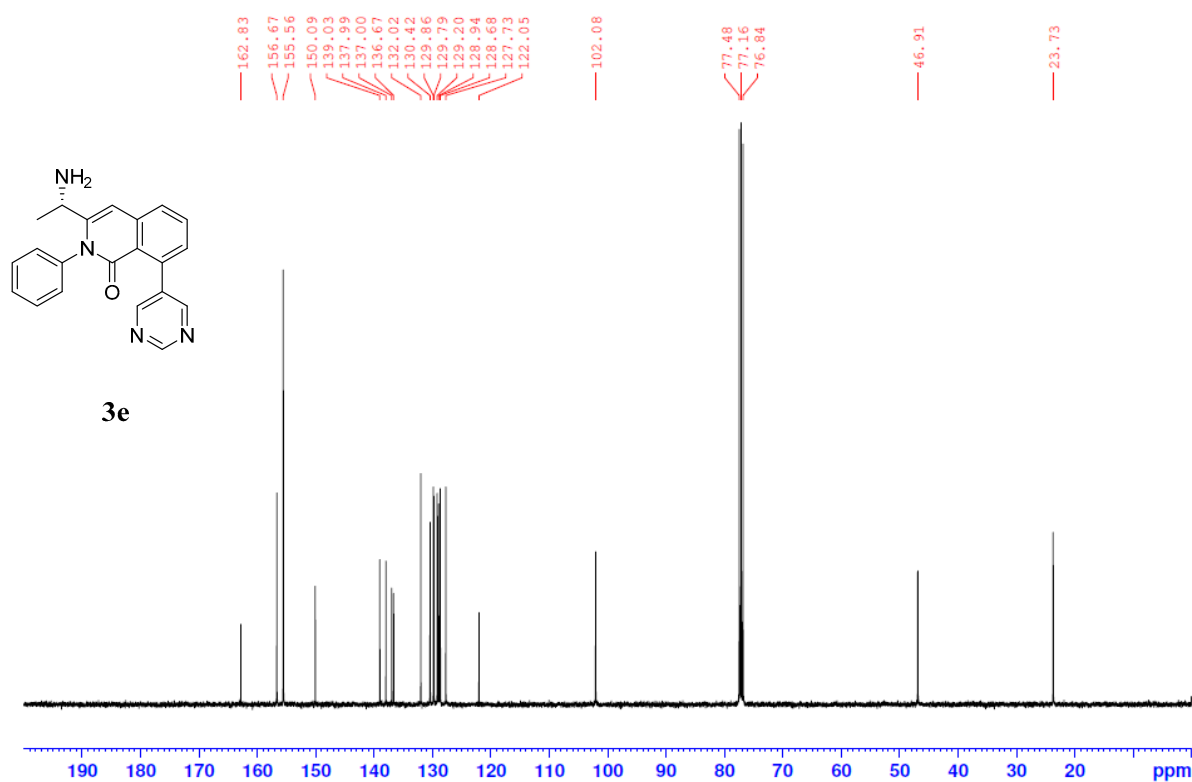

**Figure S10.** <sup>13</sup>C NMR Spectrum of 3-[(1S)-1-aminoethyl]-2-phenyl-8-pyrimidin-5-yl-isoquinolin-1-one (**3e**)

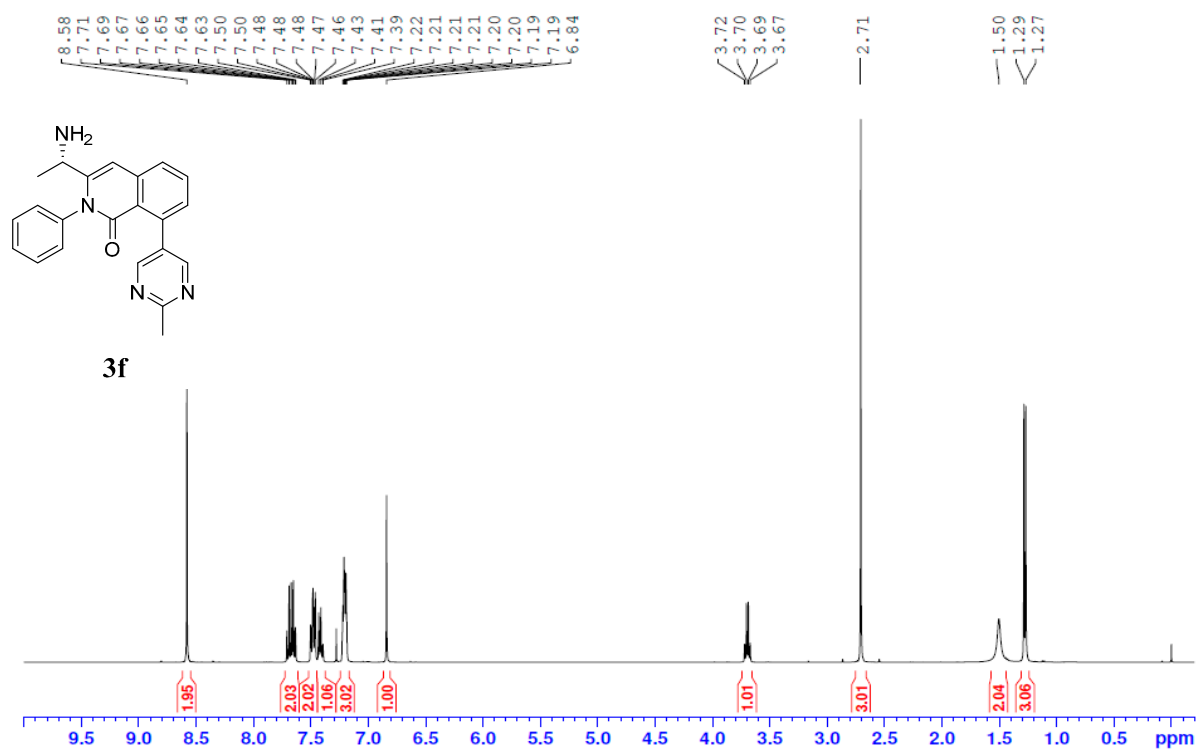

**Figure S11.** <sup>1</sup>H NMR Spectrum of 3-[(1S)-1-aminoethyl]-8-(2-methylpyrimidin-5-yl)-2-phenylisoquinolin-1-one (3f)

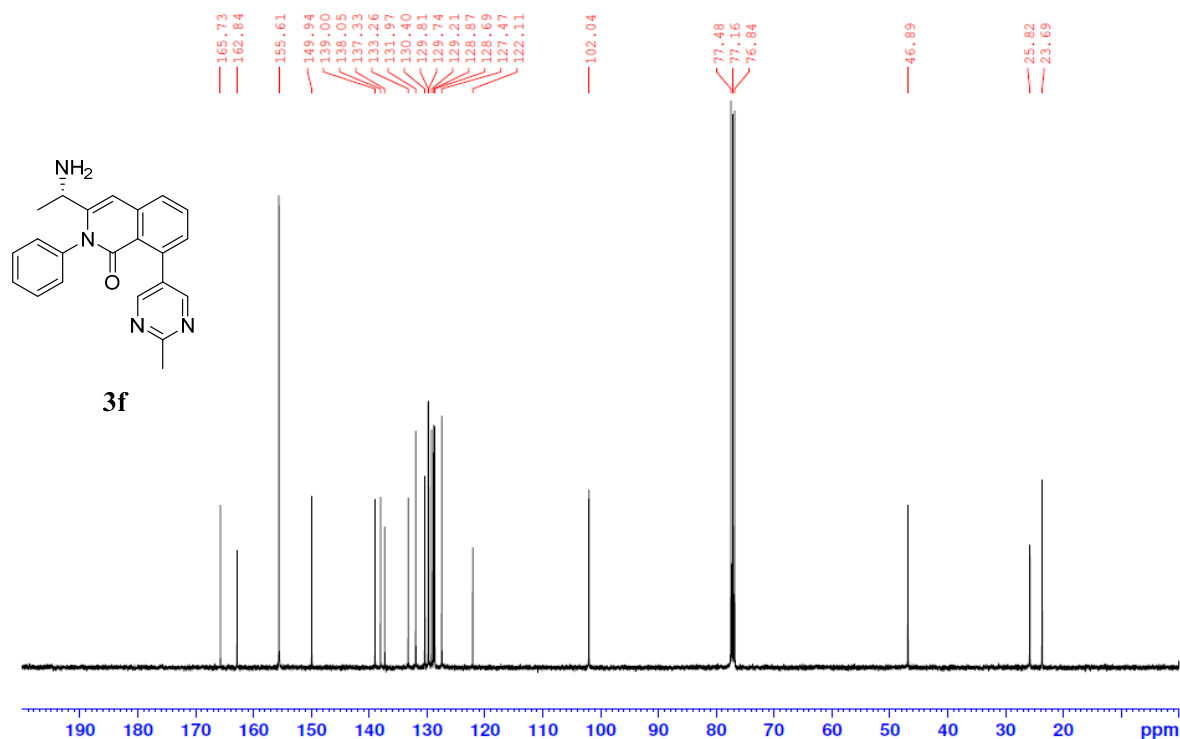

**Figure S12.** <sup>13</sup>C NMR Spectrum of 3-[(1S)-1-aminoethyl]-8-(2-methylpyrimidin-5-yl)-2-phenylisoquinolin-1-one (3f)

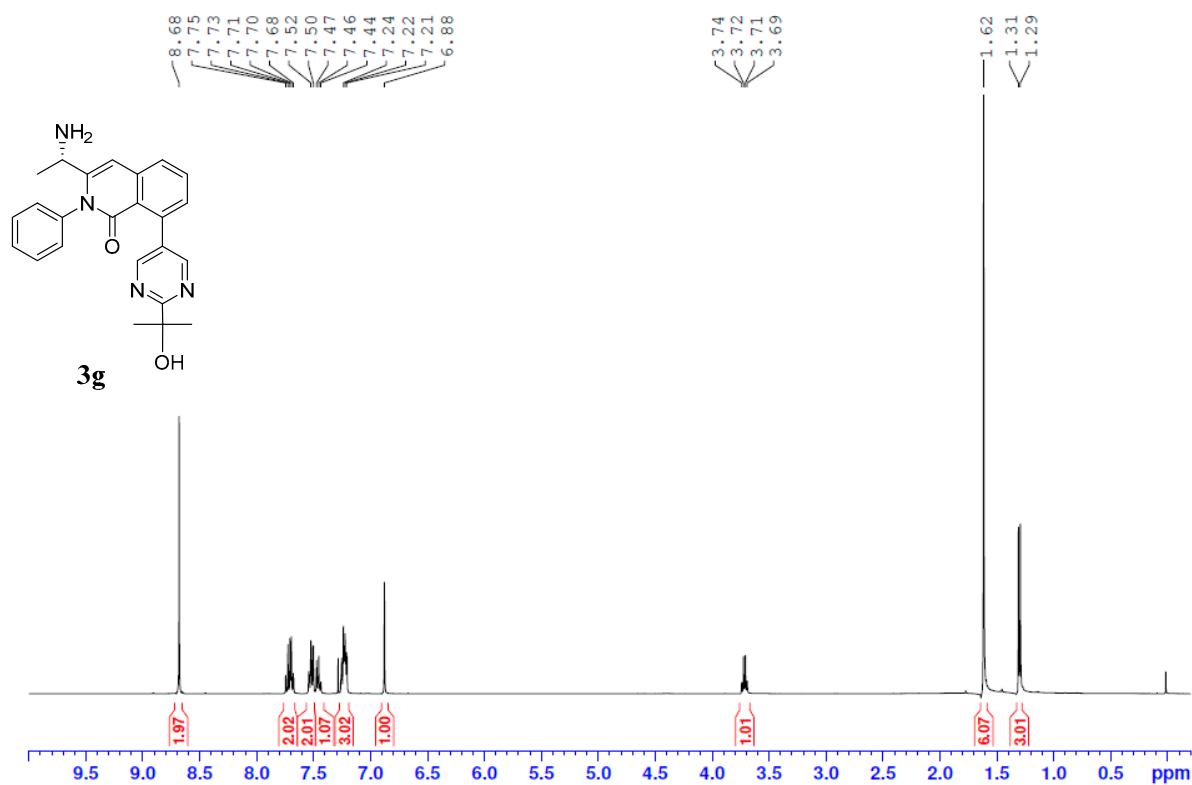

**Figure S13.** <sup>1</sup>H NMR Spectrum of 3-[(1*S*)-1-aminoethyl]-8-[2-(1-hydroxy-1-methyl-ethyl)pyrimidin-5-yl]-2-phenyl-isoquinolin-1-one (**3g**)

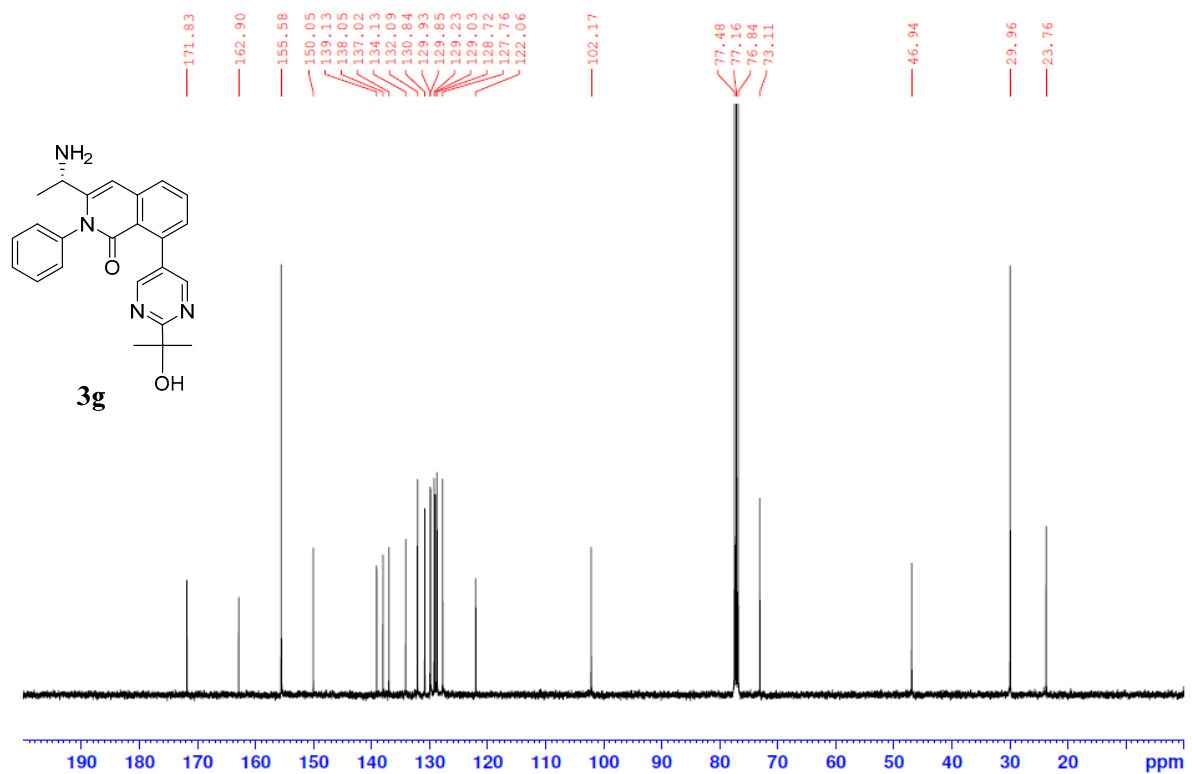

**Figure S14.** <sup>13</sup>C NMR Spectrum of 3-[(1*S*)-1-aminoethyl]-8-[2-(1-hydroxy-1-methyl-ethyl)pyrimidin-5-yl]-2-phenyl-isoquinolin-1-one (**3g**)



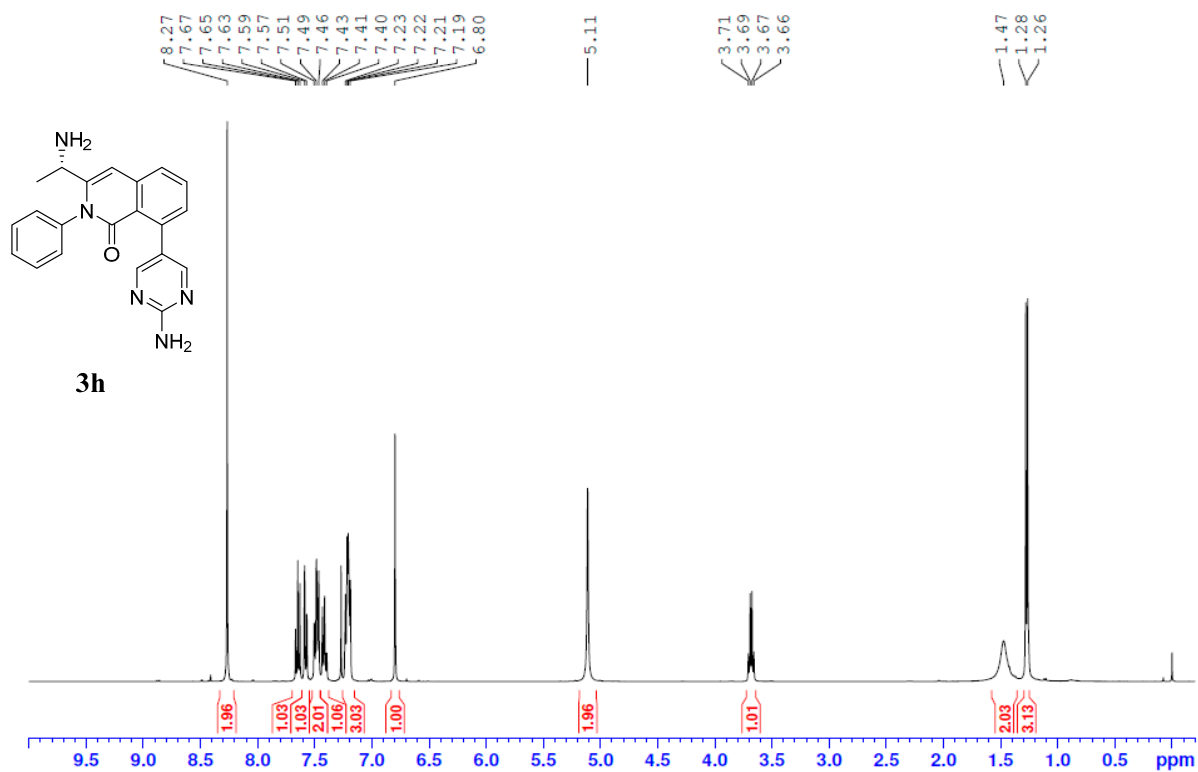

**Figure S15.** <sup>1</sup>H NMR Spectrum of 3-[(1S)-1-aminoethyl]-8-(2-aminopyrimidin-5-yl)-2-phenylisoquinolin-1-one (**3h**)

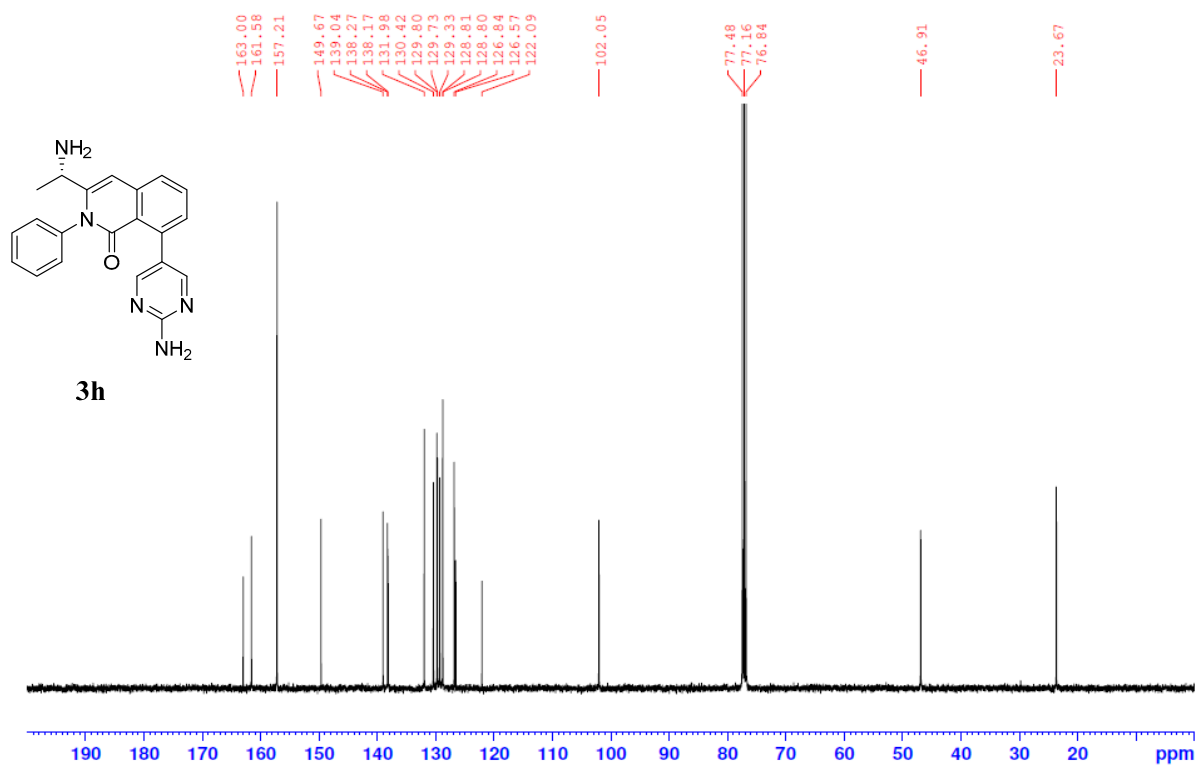

**Figure S16.** <sup>13</sup>C NMR Spectrum of 3-[(1S)-1-aminoethyl]-8-(2-aminopyrimidin-5-yl)-2-phenylisoquinolin-1-one (**3h**)



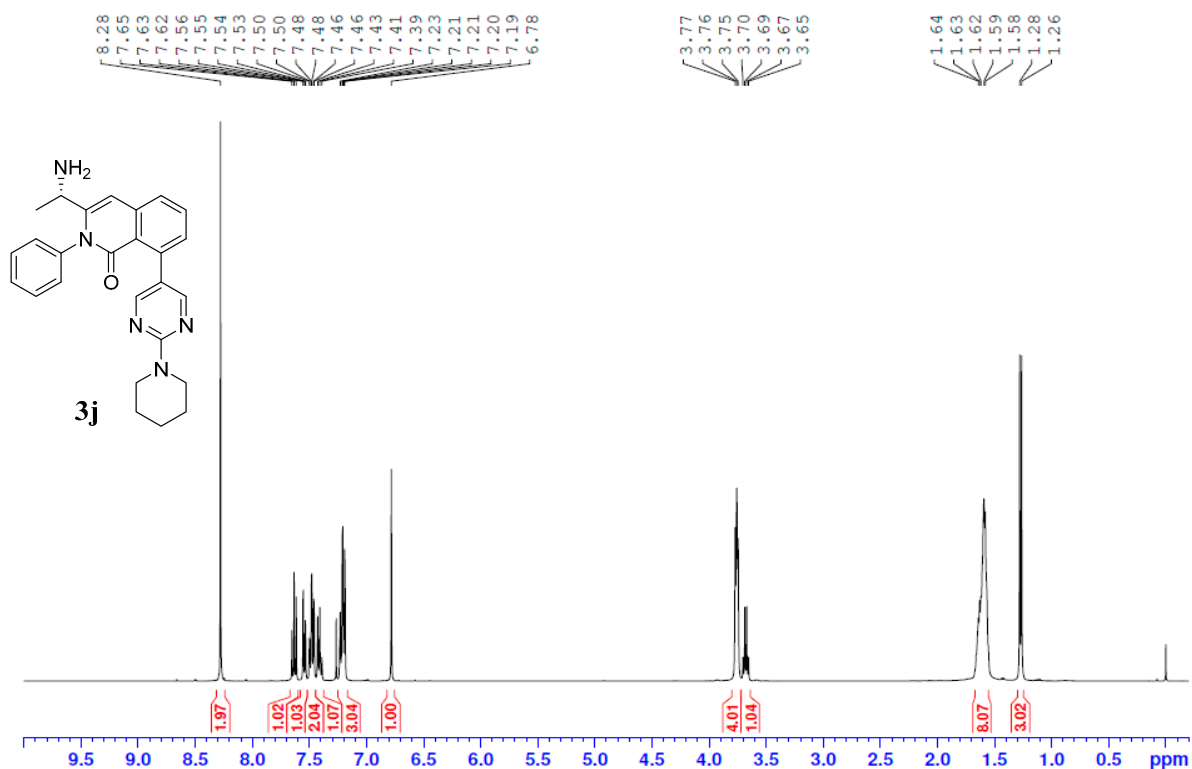

**Figure S19.** <sup>1</sup>H NMR Spectrum of 3-[(1S)-1-aminoethyl]-2-phenyl-8-[2-(1-piperidyl)pyrimidin-5-yl]isoquinolin-1-one (**3j**)

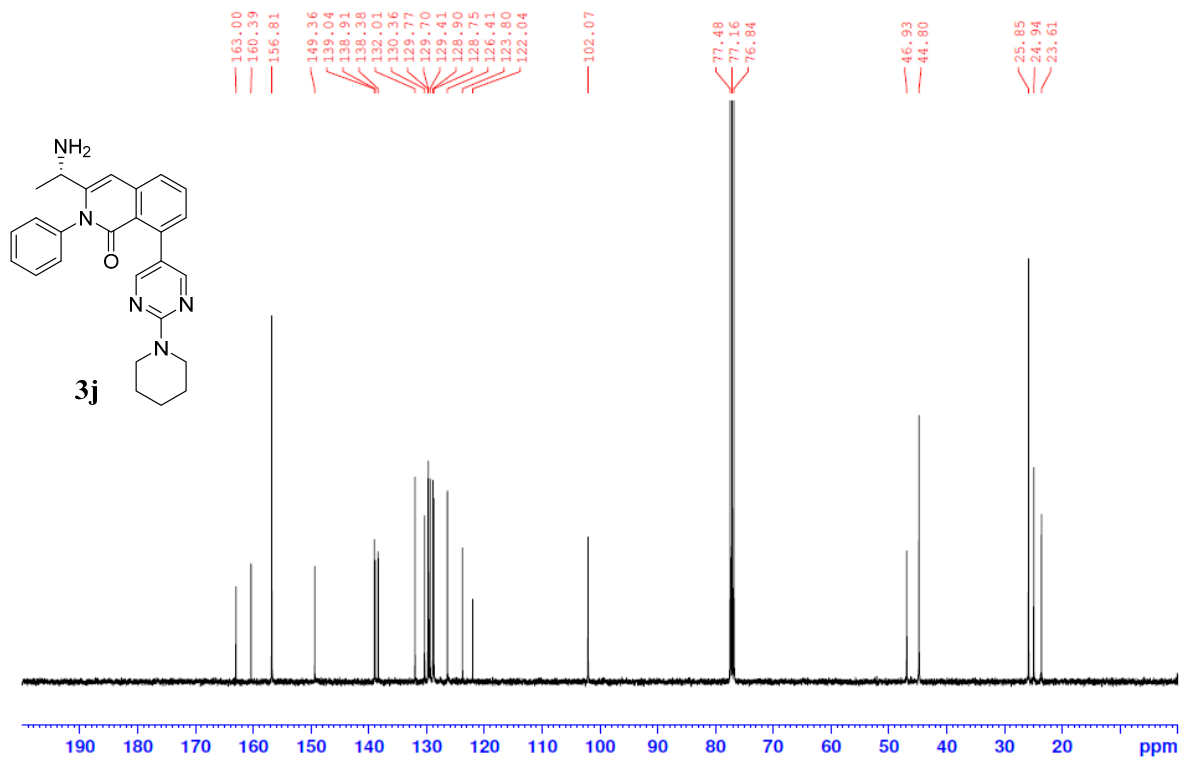

**Figure S20.** <sup>13</sup>C NMR Spectrum of 3-[(1S)-1-aminoethyl]-2-phenyl-8-[2-(1-piperidyl)pyrimidin-5-yl]isoquinolin-1-one (**3j**)

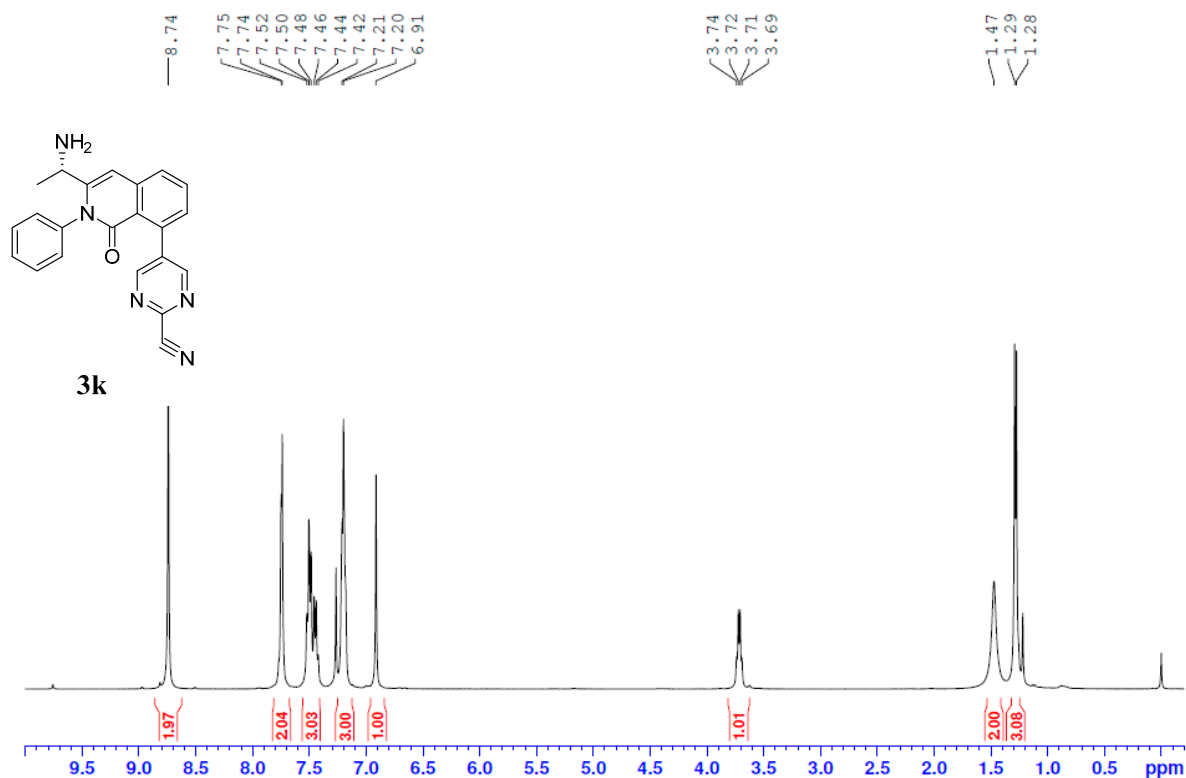

**Figure S21.** <sup>1</sup>H NMR Spectrum of 5-[3-[(1S)-1-aminoethyl]-1-oxo-2-phenyl-8-isoquinolyl]pyrimidine-2-carbonitrile (**3k**)

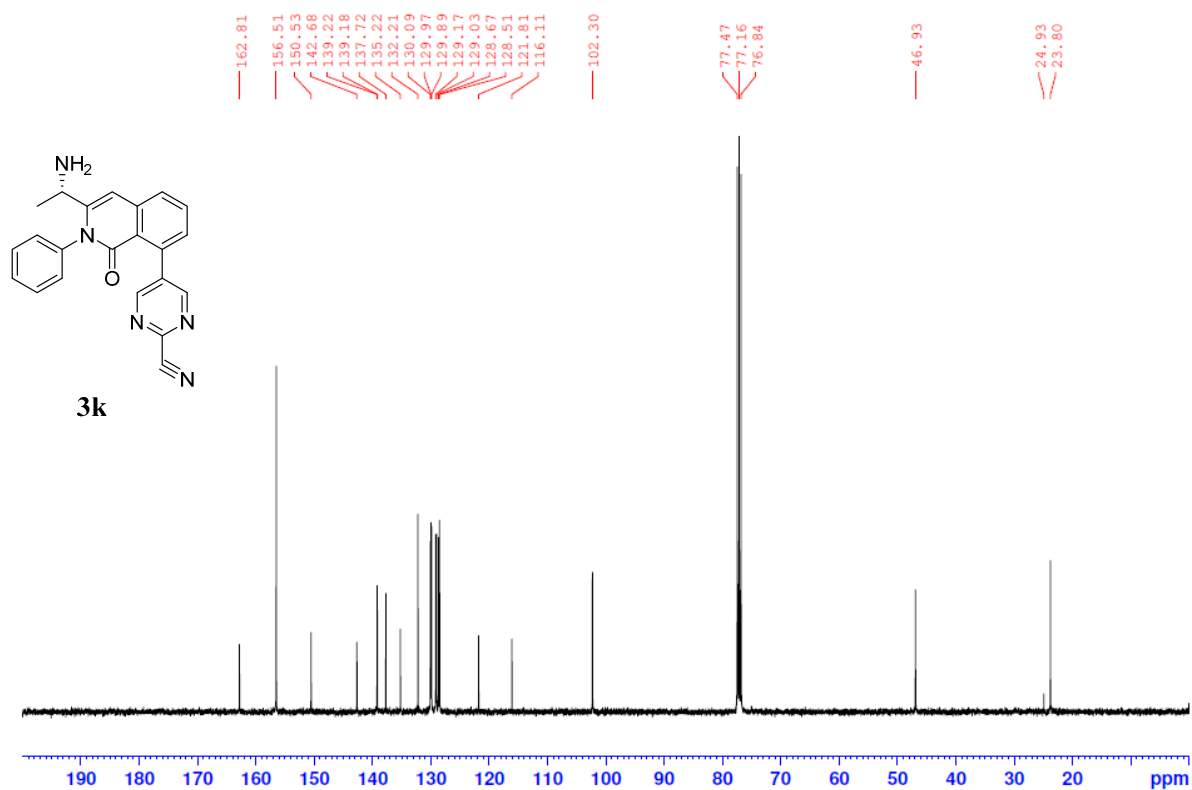

**Figure S22.** <sup>13</sup>C NMR Spectrum of 5-[3-[(1S)-1-aminoethyl]-1-oxo-2-phenyl-8-isoquinolyl]pyrimidine-2-carbonitrile (**3k**)

## MTT cytotoxicity assay

The cell viability of the cultured cells was determined by measuring the reduction of 3-(4,5-dimethylthiazol-2-yl)-2,5-diphenyltetrazolium bromide (MTT) to formazan. Briefly, cells were seeded and treated with different concentrations of the synthesized compounds. After incubation with LPS (100 ng/mL) for 24 h, 0.5 mg/mL of MTT solution was added to each well. After incubation for 2 h at 37 °C and 5% CO<sub>2</sub>, the supernatants were removed and the formed formazan crystals in the viable cells were dissolved in dimethyl sulfoxide (DMSO). The absorbance at 550 nm was determined using a microplate reader (Molecular device, USA).

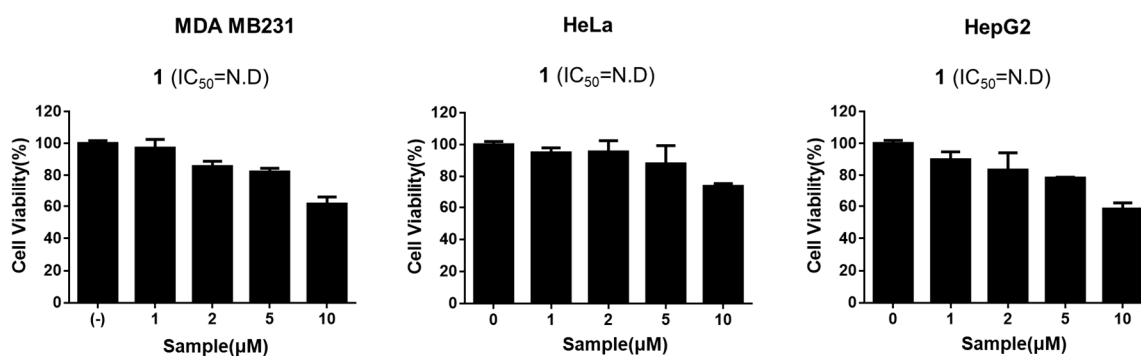

**Figure S23.** Cell toxicity of (S)-3-(1-aminoethyl)-8-chloro-2-phenylisoquinolin-1(2H)-one (**1**) for MDA-MB 231, HeLa, HepG2.

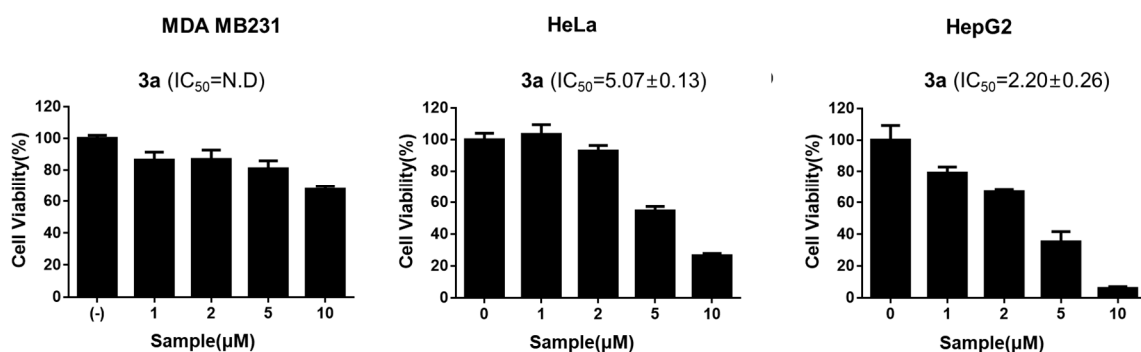

**Figure S24.** Cell toxicity of 3-[(1S)-1-aminoethyl]-8-(2-methoxypyrimidin-5-yl)-2-phenyl-isoquinolin-1-one (**3a**) for MDA-MB 231, HeLa, HepG2.

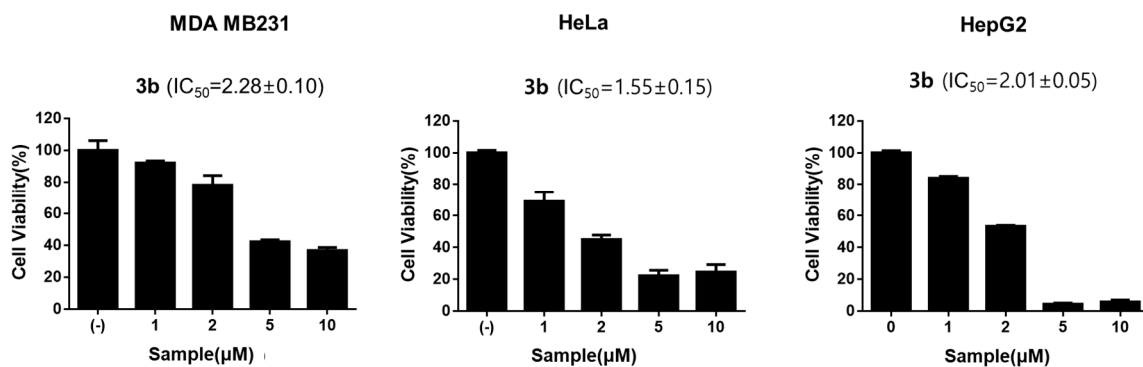

**Figure S25.** Cell toxicity of 3-[(1S)-1-aminoethyl]-8-(2-ethoxypyrimidin-5-yl)-2-phenyl-isoquinolin-1-one (**3b**) for MDA-MB 231, HeLa, HepG2.

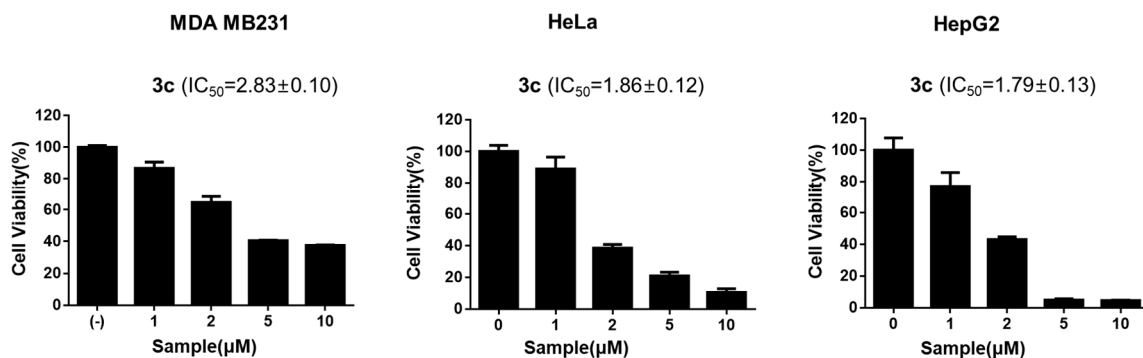

**Figure S26.** Cell toxicity of 3-[(1S)-1-aminoethyl]-8-(2-isopropoxypyrimidin-5-yl)-2-phenyl-isoquinolin-1-one (**3c**) for MDA-MB 231, HeLa, HepG2.

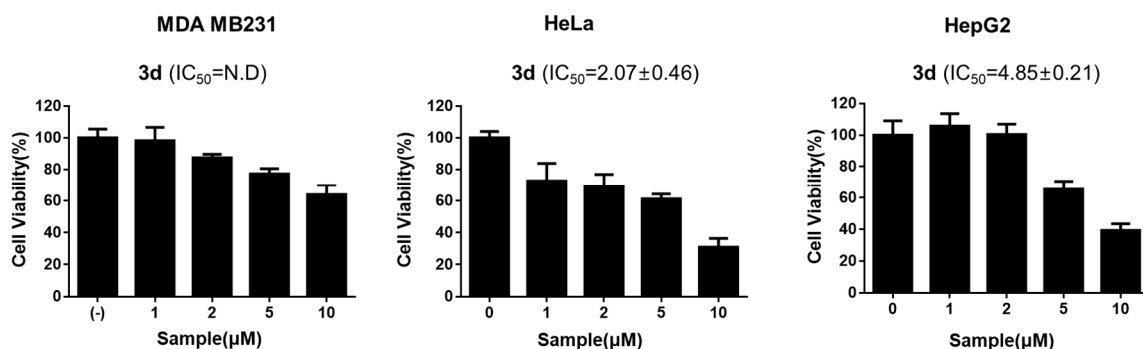

**Figure S27.** Cell toxicity of 3-[(1S)-1-aminoethyl]-8-(2,4-dimethoxypyrimidin-5-yl)-2-phenyl-isoquinolin-1-one (**3d**) for MDA-MB 231, HeLa, HepG2.

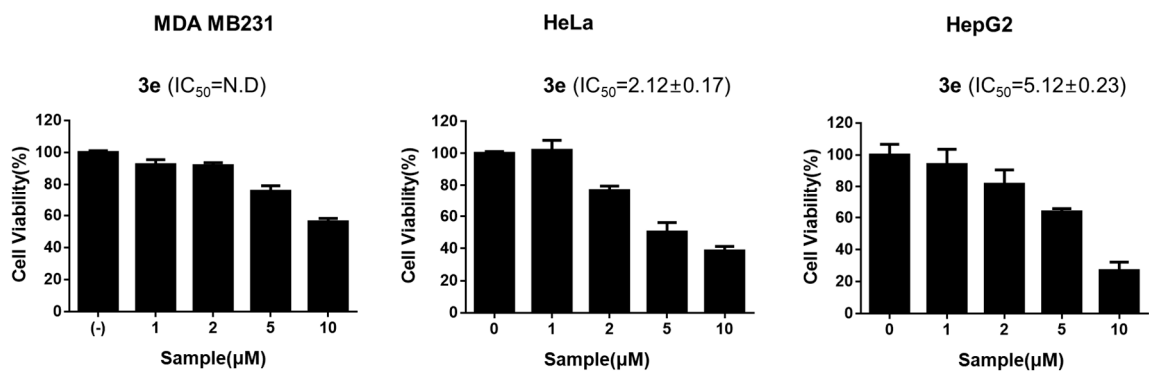

**Figure S28.** Cell toxicity of 3-[(1S)-1-aminoethyl]-2-phenyl-8-pyrimidin-5-yl-isoquinolin-1-one (**3e**) for MDA-MB 231, HeLa, HepG2.

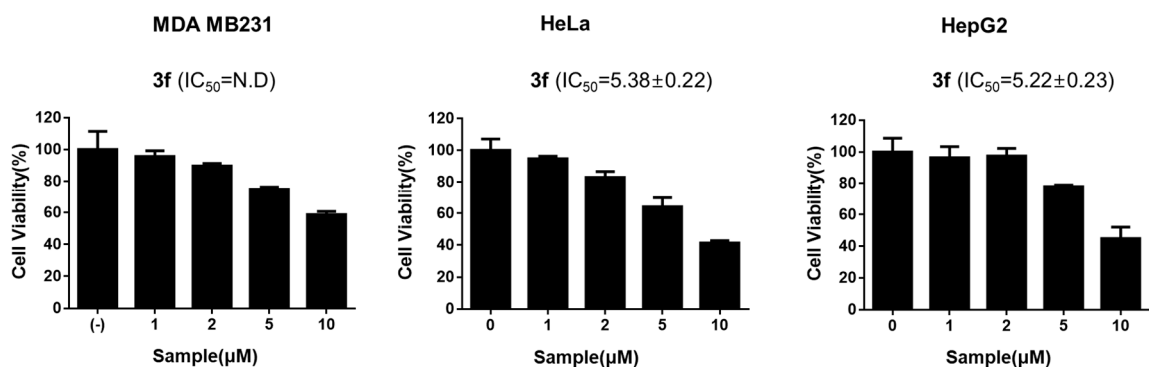

**Figure S29.** Cell toxicity of 3-[(1S)-1-aminoethyl]-8-(2-methylpyrimidin-5-yl)-2-phenyl-isoquinolin-1-one (**3f**) for MDA-MB 231, HeLa, HepG2.

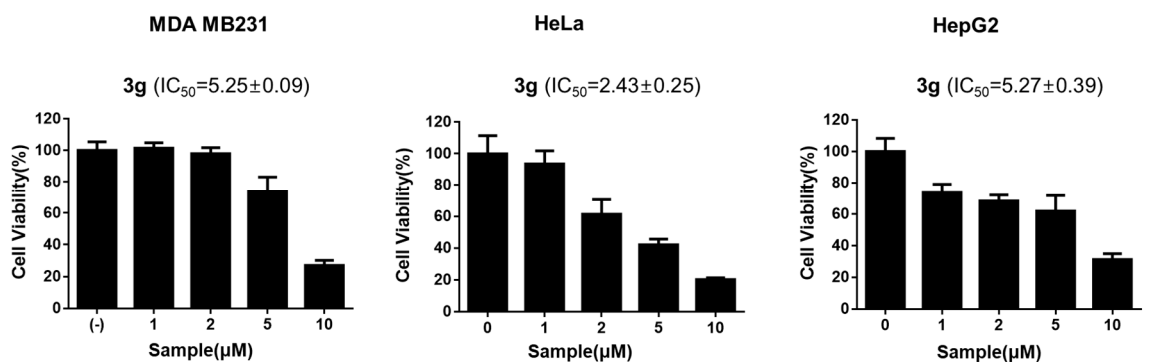

**Figure S30.** Cell toxicity of 3-[(1S)-1-aminoethyl]-8-[2-(1-hydroxy-1-methyl-ethyl)pyrimidin-5-yl]-2-phenyl-isoquinolin-1-one (**3g**) for MDA-MB 231, HeLa, HepG2.

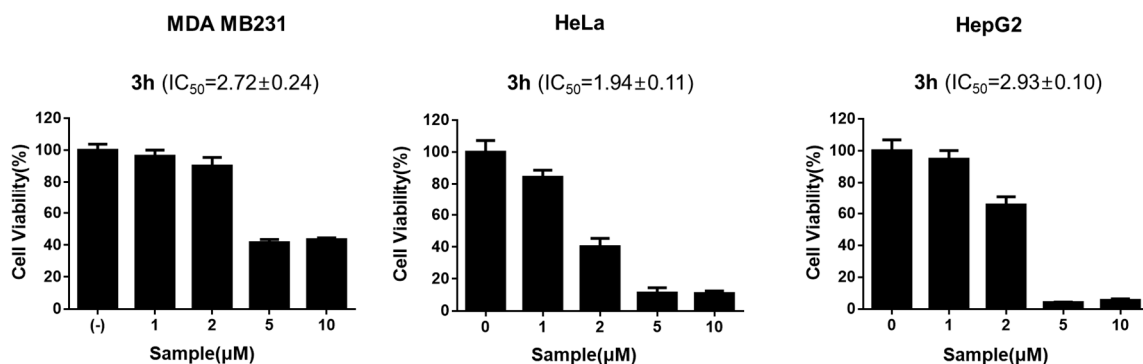

**Figure S31.** Cell toxicity of 3-[(1S)-1-aminoethyl]-8-(2-aminopyrimidin-5-yl)-2-phenyl-isoquinolin-1-one (**3h**) for MDA-MB 231, HeLa, HepG2.

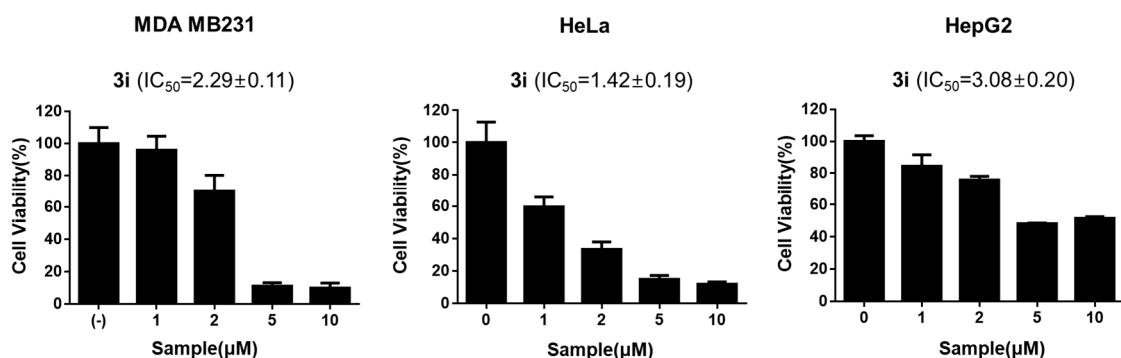

**Figure S32.** Cell toxicity of 3-[(1S)-1-aminoethyl]-8-[2-(dimethylamino)pyrimidin-5-yl]-2-phenyl-isoquinolin-1-one (**3i**) for MDA-MB 231, HeLa, HepG2.

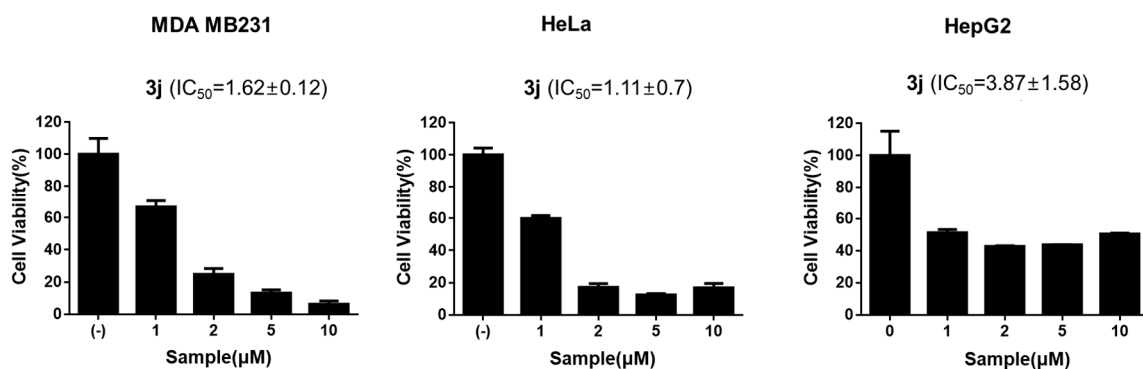

**Figure S33.** Cell toxicity of 3-[(1S)-1-aminoethyl]-2-phenyl-8-[2-(1-piperidyl)pyrimidin-5-yl]isoquinolin-1-one (**3j**) for MDA-MB 231, HeLa, HepG2.



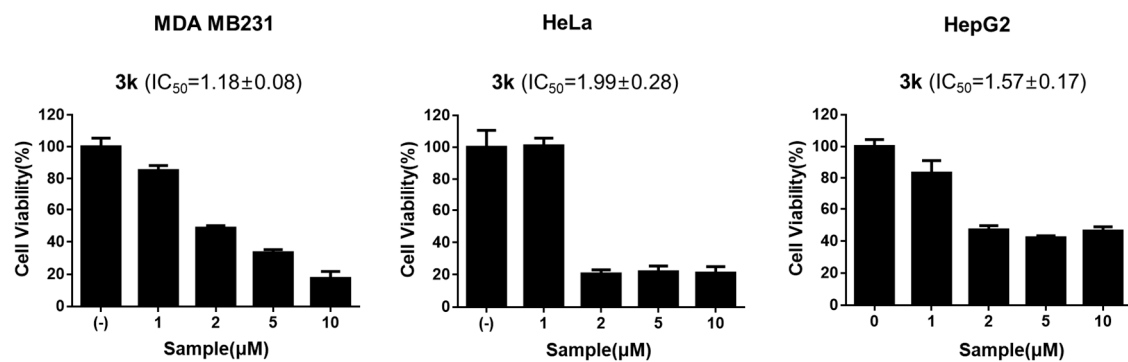

**Figure S34.** Cell toxicity of 5-[3-[(1S)-1-aminoethyl]-1-oxo-2-phenyl-8-isoquinolyl]pyrimidine-2-carbonitrile (**3k**) for MDA-MB 231, HeLa, HepG2.
